# Supplementary material
Source: PubMed Central journal article supplement (PMC7511428)
Supplement: NIHMS1621751-supplement-1.pdf [file NIHMS1621751-supplement-1.pdf]

54. Mulvaney KM, Matson JP, Siesser PF, *et al.* Identification and Characterization of MCM3 as a Kelch-like ECH-associated Protein 1 (KEAP1) Substrate. *J Biol Chem* 2016; **291**: 23719-23733.
55. Bacchetti S, Graham FL. Transfer of the gene for thymidine kinase to thymidine kinase-deficient human cells by purified herpes simplex viral DNA. *Proc Natl Acad Sci U S A* 1977; **74**: 1590-1594.
56. Cloer EW, Siesser PF, Cousins EM, *et al.* p62-Dependent Phase Separation of Patient-Derived KEAP1 Mutations and NRF2. *Mol Cell Biol* 2018; **38**.
57. Moehlenkamp JD, Johnson JA. Activation of antioxidant/electrophile-responsive elements in IMR-32 human neuroblastoma cells. *Arch Biochem Biophys* 1999; **363**: 98-106.
58. You Y, Brody SL. Culture and differentiation of mouse tracheal epithelial cells. *Methods Mol Biol* 2013; **945**: 123-143.
59. Liu X, Krawczyk E, Supryniewicz FA, *et al.* Conditional reprogramming and long-term expansion of normal and tumor cells from human biospecimens. *Nat Protoc* 2017; **12**: 439-451.
60. FASTX Toolkit: Available from: [http://hannonlab.cshl.edu/fastx\\_toolkit/](http://hannonlab.cshl.edu/fastx_toolkit/) [Last accessed 30/08/2019]
61. Martin M. Cutadapt removes adapter sequences from high-throughput sequencing reads. *EMBnetjournal* 2011; **17**: 10-12.
62. Dobin A, Davis CA, Schlesinger F, *et al.* STAR: ultrafast universal RNA-seq aligner. *Bioinformatics* 2013; **29**: 15-21.
63. Patro R, Duggal G, Love MI, *et al.* Salmon provides fast and bias-aware quantification of transcript expression. *Nat Methods* 2017; **14**: 417-419.

64. Love MI, Huber W, Anders S. Moderated estimation of fold change and dispersion for RNA-seq data with DESeq2. *Genome Biol* 2014; **15**: 550.
65. Raudvere U, Kolberg L, Kuzmin I, *et al.* g:Profiler: a web server for functional enrichment analysis and conversions of gene lists (2019 update). *Nucleic Acids Res* 2019; **47**: W191-W198.
66. Schindelin J, Arganda-Carreras I, Frise E, *et al.* Fiji: an open-source platform for biological-image analysis. *Nat Methods* 2012; **9**: 676-682.
67. Schneider CA, Rasband WS, Eliceiri KW. NIH Image to ImageJ: 25 years of image analysis. *Nat Methods* 2012; **9**: 671-675.
68. Parlee SD, Lentz SI, Mori H, *et al.* Quantifying size and number of adipocytes in adipose tissue. *Methods Enzymol* 2014; **537**: 93-122.
